# Supplementary material for: Structure and function of the microbial consortia of activated sludge in typical municipal wastewater treatment plants in winter
Source: PubMed Central journal article supplement (PMC5738398; doi:10.1038/s41598-017-17743-x), 2017-12-20
Supplement: 41598_2017_17743_MOESM1_ESM.pdf [file 41598_2017_17743_MOESM1_ESM.pdf]

# Supplementary material

## **Structure and function of the microbial consortia of activated sludge in typical municipal wastewater treatment plants in winter**

*Bo Zhang<sup>1</sup>, Xiangyang Xu<sup>1,2</sup>, Liang Zhu<sup>1,2\*</sup>*

1. Department of Environmental Engineering, Zhejiang University, Hangzhou 310058, China P.R.

2. Zhejiang Province Key Laboratory for Water Pollution Control and Environmental Safety, Hangzhou 310058, China.P.R.

**Supplementary material 1. Microbial community  
composition at phylum level**

| Taxon                  | QG     | SX_1_A | SX_1_O | SX_2_O | SX_3_A | SX_3_O | SY_A   | SY_O   | XY     |
|------------------------|--------|--------|--------|--------|--------|--------|--------|--------|--------|
| Proteobacteria         | 48.51% | 56.05% | 64.88% | 72.68% | 61.03% | 74.38% | 69.64% | 71.01% | 64.03% |
| Bacteroidetes          | 7.63%  | 20.76% | 17.56% | 14.26% | 24.80% | 13.53% | 10.10% | 8.89%  | 18.41% |
| Chloroflexi            | 17.10% | 0.95%  | 0.56%  | 1.33%  | 0.36%  | 1.38%  | 1.28%  | 0.94%  | 2.90%  |
| Firmicutes             | 2.41%  | 9.17%  | 0.15%  | 0.20%  | 7.48%  | 0.14%  | 0.39%  | 0.34%  | 1.50%  |
| Nitrospirae            | 10.23% | 0.13%  | 1.30%  | 1.55%  | 0.00%  | 1.56%  | 3.08%  | 3.28%  | 0.21%  |
| Acidobacteria          | 4.47%  | 0.09%  | 1.66%  | 1.23%  | 0.04%  | 1.53%  | 3.60%  | 4.51%  | 1.92%  |
| Synergistetes          | 0.53%  | 9.85%  | 0.03%  | 0.07%  | 4.37%  | 0.05%  | 0.03%  | 0.01%  | 0.10%  |
| Actinobacteria         | 3.40%  | 0.21%  | 0.98%  | 1.54%  | 0.16%  | 1.36%  | 0.53%  | 0.49%  | 2.17%  |
| Chlorobi               | 0.40%  | 0.19%  | 7.23%  | 1.87%  | 0.02%  | 0.90%  | 1.00%  | 0.71%  | 1.96%  |
| Candidate_division_TM7 | 1.28%  | 0.09%  | 1.40%  | 1.08%  | 0.21%  | 1.01%  | 0.66%  | 0.51%  | 1.91%  |
| Planctomycetes         | 0.18%  | 0.03%  | 0.75%  | 0.93%  | 0.01%  | 1.00%  | 2.57%  | 2.54%  | 0.03%  |
| Gemmatimonadetes       | 1.00%  | 0.01%  | 0.32%  | 0.57%  | 0.00%  | 0.65%  | 1.61%  | 1.46%  | 0.16%  |
| TM6                    | 0.15%  | 0.01%  | 1.17%  | 0.70%  | 0.00%  | 0.40%  | 1.58%  | 1.53%  | 0.00%  |
| Cyanobacteria          | 0.42%  | 0.18%  | 0.86%  | 0.50%  | 0.04%  | 0.43%  | 0.01%  | 0.01%  | 1.58%  |
| Deinococcus-Thermus    | 0.04%  | 0.00%  | 0.04%  | 0.05%  | 0.03%  | 0.05%  | 2.07%  | 2.08%  | 0.32%  |
| WCHB1-60               | 1.15%  | 0.00%  | 0.00%  | 0.00%  | 0.01%  | 0.00%  | 0.00%  | 0.01%  | 0.10%  |
| Others                 | 1.10%  | 2.30%  | 1.10%  | 1.43%  | 1.45%  | 1.64%  | 1.85%  | 1.68%  | 2.72%  |

**Supplementary material 2. Microbial community  
composition at genus level**

| Taxon                           | QG     | XY     | SX-1-A | SX-1-O | SX-2-O | SX-3-A | SX-3-O | SY-A   | SY-O   |
|---------------------------------|--------|--------|--------|--------|--------|--------|--------|--------|--------|
| Thauera                         | 2.12%  | 0.52%  | 11.35% | 27.32% | 32.86% | 16.22% | 38.36% | 15.67% | 21.17% |
| Methylotenera                   | 0.00%  | 19.20% | 0.00%  | 0.38%  | 0.00%  | 0.01%  | 0.00%  | 0.00%  | 0.00%  |
| Methylphilaceae_uncultured      | 0.00%  | 12.25% | 0.00%  | 0.22%  | 0.00%  | 0.00%  | 0.00%  | 0.02%  | 0.01%  |
| Xanthomonadales_norank          | 2.30%  | 1.63%  | 0.05%  | 10.16% | 5.56%  | 0.07%  | 4.95%  | 0.76%  | 0.52%  |
| Thiobacillus                    | 0.07%  | 0.05%  | 0.09%  | 1.18%  | 2.78%  | 0.13%  | 2.94%  | 6.44%  | 10.57% |
| Nitrospira                      | 10.23% | 0.13%  | 0.13%  | 1.30%  | 1.55%  | 0.00%  | 1.56%  | 3.08%  | 3.28%  |
| Macellibacteroides              | 0.03%  | 0.11%  | 6.02%  | 0.02%  | 0.06%  | 11.25% | 0.04%  | 0.03%  | 0.00%  |
| Sh765B-TzT-29_norank            | 0.43%  | 0.01%  | 0.88%  | 0.95%  | 1.05%  | 0.24%  | 0.94%  | 7.91%  | 5.62%  |
| Saprospiraceae_uncultured       | 1.93%  | 4.94%  | 0.02%  | 1.35%  | 0.90%  | 0.04%  | 0.99%  | 0.92%  | 0.92%  |
| Desulfomicrobium                | 0.01%  | 0.09%  | 11.11% | 0.02%  | 0.00%  | 2.53%  | 0.03%  | 0.04%  | 0.01%  |
| Desulfuromonas                  | 0.00%  | 0.00%  | 7.67%  | 0.01%  | 0.03%  | 5.23%  | 0.02%  | 0.04%  | 0.02%  |
| Synergistaceae_uncultured       | 0.32%  | 0.02%  | 9.23%  | 0.00%  | 0.03%  | 3.20%  | 0.03%  | 0.02%  | 0.00%  |
| Parvularcula                    | 0.00%  | 0.00%  | 0.00%  | 0.00%  | 0.52%  | 0.01%  | 0.27%  | 7.27%  | 5.97%  |
| Propionivibrio                  | 0.08%  | 2.70%  | 3.10%  | 0.07%  | 0.02%  | 2.97%  | 0.04%  | 0.01%  | 0.00%  |
| Arcobacter                      | 0.09%  | 0.97%  | 3.15%  | 0.07%  | 0.23%  | 5.23%  | 0.18%  | 0.40%  | 0.12%  |
| Dechloromonas                   | 1.15%  | 0.81%  | 2.12%  | 0.05%  | 0.23%  | 5.61%  | 0.33%  | 0.14%  | 0.18%  |
| Comamonadaceae_unclassified     | 1.97%  | 2.00%  | 0.15%  | 3.07%  | 0.47%  | 0.34%  | 0.49%  | 1.21%  | 1.31%  |
| Caldilineaceae_uncultured       | 6.87%  | 2.00%  | 0.02%  | 0.16%  | 0.50%  | 0.06%  | 0.47%  | 0.07%  | 0.04%  |
| PHOS-HE36_norank                | 0.16%  | 0.59%  | 0.19%  | 6.56%  | 1.78%  | 0.02%  | 0.87%  | 0.99%  | 0.71%  |
| Candidate_division_TM7_norank   | 1.28%  | 2.11%  | 0.09%  | 1.40%  | 1.08%  | 0.21%  | 1.01%  | 0.66%  | 0.51%  |
| NS9_marine_group_norank         | 0.62%  | 0.07%  | 0.01%  | 1.25%  | 3.76%  | 0.03%  | 3.57%  | 0.79%  | 0.82%  |
| Cytophagaceae_uncultured        | 0.00%  | 0.00%  | 6.72%  | 0.08%  | 0.07%  | 1.65%  | 0.04%  | 0.01%  | 0.00%  |
| Chitinophagaceae_uncultured     | 0.09%  | 3.85%  | 0.02%  | 0.47%  | 0.24%  | 0.04%  | 0.26%  | 0.45%  | 0.36%  |
| Blastocatella                   | 2.06%  | 0.04%  | 0.01%  | 1.15%  | 0.52%  | 0.01%  | 0.62%  | 2.28%  | 2.93%  |
| Limnobacter                     | 1.32%  | 0.00%  | 0.37%  | 2.35%  | 1.20%  | 0.16%  | 1.31%  | 1.32%  | 1.51%  |
| Nitrosomonadaceae_uncultured    | 1.23%  | 0.28%  | 0.05%  | 1.10%  | 2.44%  | 0.00%  | 2.73%  | 0.80%  | 0.69%  |
| Paludibacter                    | 0.03%  | 0.10%  | 2.97%  | 0.01%  | 0.04%  | 3.97%  | 0.02%  | 0.03%  | 0.00%  |
| PHOS-HE51_norank                | 0.41%  | 0.22%  | 0.13%  | 0.38%  | 4.20%  | 0.03%  | 3.65%  | 0.00%  | 0.00%  |
| Hyphomicrobium                  | 1.02%  | 0.90%  | 0.13%  | 0.50%  | 1.26%  | 0.03%  | 0.78%  | 2.05%  | 1.47%  |
| Ottowia                         | 1.43%  | 1.14%  | 0.14%  | 0.26%  | 0.22%  | 0.27%  | 0.26%  | 1.10%  | 1.44%  |
| Clostridiales_uncultured        | 0.10%  | 0.00%  | 3.99%  | 0.01%  | 0.03%  | 2.04%  | 0.01%  | 0.07%  | 0.04%  |
| Nitrosomonas                    | 0.13%  | 0.69%  | 0.09%  | 1.06%  | 0.80%  | 0.02%  | 0.59%  | 1.70%  | 1.35%  |
| Geobacter                       | 0.00%  | 0.01%  | 2.57%  | 0.06%  | 0.04%  | 3.07%  | 0.05%  | 0.08%  | 0.02%  |
| Anaerolineaceae_uncultured      | 3.09%  | 0.64%  | 0.23%  | 0.14%  | 0.41%  | 0.13%  | 0.44%  | 0.47%  | 0.35%  |
| SB-1_norank                     | 0.05%  | 0.43%  | 1.56%  | 1.78%  | 0.34%  | 1.37%  | 0.30%  | 0.08%  | 0.04%  |
| Defluviicoccus                  | 4.77%  | 0.83%  | 0.01%  | 0.02%  | 0.01%  | 0.02%  | 0.00%  | 0.03%  | 0.00%  |
| env.OPS_17_norank               | 0.04%  | 0.38%  | 0.01%  | 2.57%  | 0.24%  | 0.00%  | 0.29%  | 0.93%  | 0.55%  |
| Flexibacter                     | 0.11%  | 0.04%  | 0.01%  | 2.54%  | 1.29%  | 0.00%  | 1.50%  | 0.49%  | 0.55%  |
| Woodsholea                      | 0.31%  | 0.04%  | 0.01%  | 0.34%  | 1.12%  | 0.00%  | 0.87%  | 1.90%  | 1.56%  |
| Flavobacterium                  | 0.25%  | 0.87%  | 0.09%  | 0.21%  | 0.19%  | 0.16%  | 0.17%  | 1.53%  | 1.51%  |
| Piscinibacter                   | 0.20%  | 0.11%  | 0.00%  | 0.04%  | 2.87%  | 0.00%  | 2.89%  | 0.07%  | 0.11%  |
| Gemmatimonadaceae_uncultured    | 1.00%  | 0.16%  | 0.01%  | 0.32%  | 0.57%  | 0.00%  | 0.65%  | 1.54%  | 1.36%  |
| Anaerovorax                     | 0.03%  | 0.05%  | 2.37%  | 0.00%  | 0.02%  | 2.23%  | 0.03%  | 0.02%  | 0.02%  |
| Betaproteobacteria_unclassified | 2.54%  | 0.00%  | 0.00%  | 0.29%  | 0.94%  | 0.01%  | 1.00%  | 0.08%  | 0.93%  |
| Desulfobulbus                   | 0.13%  | 0.12%  | 2.06%  | 0.01%  | 0.01%  | 2.17%  | 0.01%  | 0.00%  | 0.02%  |
| TM6_norank                      | 0.15%  | 0.01%  | 0.01%  | 1.17%  | 0.70%  | 0.00%  | 0.40%  | 1.58%  | 1.53%  |

|                                 |        |        |        |        |        |        |        |        |        |
|---------------------------------|--------|--------|--------|--------|--------|--------|--------|--------|--------|
| Ferruginibacter                 | 0.84%  | 0.18%  | 0.02%  | 0.90%  | 1.05%  | 0.04%  | 1.06%  | 0.66%  | 0.46%  |
| Truepera                        | 0.04%  | 0.24%  | 0.00%  | 0.04%  | 0.05%  | 0.03%  | 0.05%  | 2.07%  | 2.08%  |
| NS11-12_marine_group_norank     | 0.01%  | 1.63%  | 0.00%  | 0.33%  | 0.09%  | 0.00%  | 0.06%  | 0.40%  | 0.24%  |
| Alicyclophilus                  | 0.03%  | 0.01%  | 0.51%  | 0.60%  | 0.17%  | 1.22%  | 0.22%  | 0.67%  | 0.65%  |
| Terrimonas                      | 0.45%  | 0.72%  | 0.01%  | 2.20%  | 0.16%  | 0.00%  | 0.14%  | 0.03%  | 0.05%  |
| Methyloversatilis               | 0.04%  | 0.02%  | 0.01%  | 0.23%  | 0.95%  | 0.01%  | 1.24%  | 0.70%  | 1.16%  |
| TK10_norank                     | 3.03%  | 0.23%  | 0.01%  | 0.02%  | 0.04%  | 0.01%  | 0.05%  | 0.12%  | 0.09%  |
| A0839_norank                    | 1.06%  | 0.01%  | 0.00%  | 0.00%  | 2.20%  | 0.00%  | 1.13%  | 0.00%  | 0.00%  |
| OM190_norank                    | 0.06%  | 0.01%  | 0.00%  | 0.18%  | 0.71%  | 0.00%  | 0.79%  | 0.85%  | 1.20%  |
| Pseudomonas                     | 0.24%  | 0.13%  | 0.58%  | 0.06%  | 0.04%  | 1.36%  | 0.04%  | 0.32%  | 0.18%  |
| Comamonas                       | 0.03%  | 0.01%  | 0.58%  | 0.03%  | 0.07%  | 1.93%  | 0.06%  | 0.20%  | 0.09%  |
| Aeromonas                       | 0.00%  | 0.12%  | 0.80%  | 0.00%  | 0.01%  | 1.92%  | 0.00%  | 0.01%  | 0.00%  |
| Sulfurospirillum                | 0.00%  | 0.06%  | 1.06%  | 0.02%  | 0.01%  | 1.75%  | 0.02%  | 0.00%  | 0.00%  |
| Roseomonas                      | 1.19%  | 0.09%  | 0.17%  | 0.36%  | 0.15%  | 0.13%  | 0.16%  | 0.54%  | 0.53%  |
| SM1A02                          | 0.03%  | 0.02%  | 0.03%  | 0.43%  | 0.10%  | 0.01%  | 0.11%  | 1.45%  | 1.20%  |
| Subgroup_6_norank               | 1.14%  | 0.06%  | 0.03%  | 0.03%  | 0.44%  | 0.01%  | 0.58%  | 0.26%  | 0.29%  |
| JG30-KF-CM45_norank             | 2.77%  | 0.10%  | 0.02%  | 0.03%  | 0.00%  | 0.01%  | 0.02%  | 0.08%  | 0.11%  |
| Bradyrhizobiaceae_unclassified  | 0.50%  | 0.17%  | 0.02%  | 0.04%  | 0.08%  | 0.01%  | 0.08%  | 1.27%  | 0.81%  |
| Methylocystaceae_unclassified   | 1.02%  | 1.28%  | 0.00%  | 0.06%  | 0.02%  | 0.00%  | 0.01%  | 0.01%  | 0.01%  |
| Desulfovibrio                   | 0.05%  | 0.02%  | 1.07%  | 0.00%  | 0.00%  | 1.33%  | 0.00%  | 0.00%  | 0.00%  |
| Halomonas                       | 0.02%  | 1.04%  | 0.01%  | 0.06%  | 0.01%  | 0.00%  | 0.02%  | 0.07%  | 0.07%  |
| Rhodobacteraceae_unclassified   | 1.32%  | 0.44%  | 0.12%  | 0.11%  | 0.11%  | 0.07%  | 0.10%  | 0.04%  | 0.05%  |
| Arenimonas                      | 0.02%  | 0.00%  | 0.37%  | 1.95%  | 0.16%  | 0.23%  | 0.12%  | 0.02%  | 0.04%  |
| Bacteroides                     | 0.01%  | 0.05%  | 0.85%  | 0.00%  | 0.02%  | 1.31%  | 0.01%  | 0.01%  | 0.01%  |
| Microbacteriaceae_unclassified  | 0.03%  | 0.00%  | 0.01%  | 0.63%  | 1.02%  | 0.00%  | 0.99%  | 0.16%  | 0.12%  |
| Moraxellaceae_uncultured        | 0.00%  | 0.66%  | 0.00%  | 0.25%  | 0.17%  | 0.00%  | 0.08%  | 0.02%  | 0.01%  |
| Trichococcus                    | 0.75%  | 1.27%  | 0.01%  | 0.02%  | 0.01%  | 0.01%  | 0.01%  | 0.02%  | 0.00%  |
| Flavobacteriaceae_uncultured    | 0.00%  | 0.00%  | 0.00%  | 0.04%  | 0.00%  | 0.00%  | 0.01%  | 1.03%  | 1.30%  |
| Desulfobacter                   | 0.00%  | 0.04%  | 0.49%  | 0.00%  | 0.00%  | 1.33%  | 0.00%  | 0.01%  | 0.00%  |
| SC-I-84_norank                  | 1.62%  | 0.16%  | 0.01%  | 0.08%  | 0.06%  | 0.01%  | 0.07%  | 0.00%  | 0.00%  |
| Sphingobacteriales_unclassified | 0.06%  | 0.46%  | 0.00%  | 0.25%  | 0.00%  | 0.01%  | 0.01%  | 0.00%  | 0.00%  |
| SM2D12_norank                   | 0.01%  | 0.00%  | 0.00%  | 0.31%  | 1.17%  | 0.00%  | 0.69%  | 0.08%  | 0.07%  |
| Rhodocyclaceae_unclassified     | 1.66%  | 0.00%  | 0.01%  | 0.02%  | 0.02%  | 0.00%  | 0.02%  | 0.01%  | 0.06%  |
| Rhodobacter                     | 1.18%  | 0.24%  | 0.00%  | 0.00%  | 0.00%  | 0.01%  | 0.01%  | 0.03%  | 0.02%  |
| Pelobacter                      | 0.00%  | 0.00%  | 1.03%  | 0.00%  | 0.00%  | 0.30%  | 0.00%  | 0.00%  | 0.00%  |
| Hyphomicrobiaceae_uncultured    | 1.16%  | 0.05%  | 0.01%  | 0.05%  | 0.05%  | 0.02%  | 0.04%  | 0.07%  | 0.05%  |
| Ferribacterium                  | 1.28%  | 0.07%  | 0.01%  | 0.00%  | 0.02%  | 0.02%  | 0.03%  | 0.00%  | 0.00%  |
| VC2.1_Bac22_norank              | 0.00%  | 0.00%  | 0.00%  | 1.33%  | 0.19%  | 0.00%  | 0.13%  | 0.00%  | 0.00%  |
| WCHB1-60_norank                 | 1.15%  | 0.10%  | 0.00%  | 0.00%  | 0.00%  | 0.01%  | 0.00%  | 0.00%  | 0.01%  |
| Others                          | 27.04% | 29.19% | 13.23% | 16.87% | 17.45% | 16.13% | 15.94% | 23.70% | 18.90% |

### **Supplementary material 3. Sample position on PC1-PC2-PC3 dimensionality**

|        | PC1      | PC2      | PC3      |
|--------|----------|----------|----------|
| XY     | -0.50947 | 0.82299  | 0.108863 |
| QG     | -0.29771 | 0.620471 | -0.06315 |
| SX_1_O | 0.451436 | -0.08416 | 0.254327 |
| SX_2_O | 0.617662 | -0.10662 | 0.49376  |
| SX_3_O | 0.60081  | -0.10235 | 0.493091 |
| SY_O   | 0.469239 | -0.09663 | -0.66302 |
| SX_1_A | -0.83256 | -0.50274 | 0.050675 |
| SX_3_A | -0.90188 | -0.4737  | 0.041859 |
| SY_A   | 0.402465 | -0.07726 | -0.7164  |

### **Supplementary material 4. The detailed method for DNA extraction with liquid nitrogen pretreatment**

In this study, DNA extraction steps could be divided into two parts. The First is crude DNA extraction with liquid nitrogen grinding, second is DNA purification with commercialized DNA isolation kit.

#### **Crude DNA extraction**

- 1) 500 mg of glass beads and 2 g of frozen sludge samples were loaded into clean mortars and overlaid with 2ml Tris-HCl buffer (pH 7.0).
- 2) Sample were dispersed with a pestle and then overlaid with liquid nitrogen, followed by adequate ground until thawed twice. Then collected mixed liquor into centrifuge tubes.
- 3) Added 500 $\mu$ l of 2% lysozyme solution and 500  $\mu$ l of 20% (w/v) sodium dodecyl sulfate (SDS) into centrifuge tube. The mixtures were incubated at 37°C for half an hour.
- 4) After entrifuge (7000 $\times$ g, 10min, 4°C), the supernatant were extracted using water balanced phenol-chloroform-isoamyl alcohol (25:24:1) and centrifugation (10,000 $\times$ g, 10min, 4°C). Repeat the step until denatured protein vanished.
- 5) Collected the supernatant carefully and precipitated the crude DNA extract with 0.8 volume of

isopropyl alcohol. Centrifuged (12,000×g, 10min, 4°C) and washed the precipitate (crude DNA extract) with 75% ethanol three times. After drained the precipitate in clean bench, dissolved with 100-200μl ddH<sub>2</sub>O.

### **DNA purification**

The goal is remove RNA and organic solvent in crude DNA extraction. Add 10U RNA enzyme into Crude DNA extraction and incubate the mixtures at 37°C for half an hour. Then utilized the adsorption column in DNA isolation kit to remove residual organic compound. Purification procedure refers instruction manual of universal commercialized DNA extraction kit, but ignore the beginning cell lysis procedure.
